# Supplementary material
Source: PubMed Central journal article supplement (PMC3454884)
Supplement: 7d53b37bb7452f8ca5efe54e500e4f43_genetics.112.140871-2.pdf [file 7d53b37bb7452f8ca5efe54e500e4f43_genetics.112.140871-2.pdf]

## File S3

### The MCMC sampling scheme

We used a random-walk Metropolis-Hastings algorithm to sample the joint posterior density of  $\mathbf{q}$ ,  $\mathbf{a}$  and  $\boldsymbol{\kappa}$ . Below, we describe how each parameter was sampled while keeping the other parameters fixed.

- Sampling the drift parameters  $\mathbf{a}$ . We used  $N(a_k, \delta_{a_k}^2)$  distributions separately for each  $k$  to draw proposals for  $\log a_k$ . The variance parameters  $\delta_{a_k}^2$  were adjusted during the burn-in as in Ovaskainen *et al.* (2008) to give an accept ratio of 0.44.
- Sampling lineage loadings  $\boldsymbol{\kappa}$ . We used  $\text{TDD}(\delta_{\boldsymbol{\kappa}_A}, \boldsymbol{\kappa}_A)$ , i.e. truncated Dirichlet, distributions (Fang *et al.* 2000) separately for each  $A$  and  $j$  to draw proposals for  $\boldsymbol{\kappa}_A$ . The  $\delta_{\boldsymbol{\kappa}_A}$ 's are proposal parameters that were adjusted during the burn-in as in Ovaskainen *et al.* (2008) to give an accept ratio of 0.44.
- Sampling ancestral allele frequencies  $\mathbf{q}$  and lineage-specific allele frequencies  $\mathbf{z}$ . We used  $\text{TDD}(\delta_{q_j}, \mathbf{q}_j)$  and  $\text{TDD}(\delta_{z_{kj}}, \mathbf{z}_{kj})$  distributions separately for each  $j$  and  $k$  to draw proposals for the allele frequencies. The  $\delta_{q_j}$ 's are proposal parameters that are adjusted during the burn-in as in Ovaskainen *et al.* (2008) to give an accept ratio of 0.44.

We thus used the truncated Dirichlet distribution of Fang *et al.* (2000) to perform the Metropolis-Hastings random walk for the Dirichlet-distributed variables  $\boldsymbol{\kappa}$ ,  $\mathbf{q}$  and  $\mathbf{z}$  with a pre-set truncation threshold  $\tau = 10^{-7}$ . This greatly improves the mixing properties of the Markov chain, because it helps to avoid numerical problems on the boundary of the parameter space (i.e. on the edges of the simplices  $\Delta^{n_j-1}$  and  $\Delta^{n_p-1}$ ). According to our observation, the method that Fang *et al.* (2000) present for sampling from TDD may produce biased samples for high truncation thresholds such as  $\tau = 10^{-1}$ . However, to our experience, this does not compromise the statistical power of our algorithm with  $\tau = 10^{-7}$ .

We have implemented the algorithm described above in the R-package RAFM (Karhunen 2012).

### References

- Fang, K.T., Z. Geng and G.L. Tian, 2000 Statistical inference for the truncated Dirichlet distribution and its application in misclassification. *Biometrical Journal* **42**: 1053-1068.
- Karhunen, M., 2012 RAFM: Admixture F-model. <http://CRAN.R-project.org/package=RAFM>.
- Ovaskainen, O., H. Rekola, E. Meyke and E. Arjas, 2008 Bayesian methods for analyzing movements in heterogeneous landscapes from mark-recapture data. *Ecology* **89**: 542-554.
